# Supplementary material for: One-step structure-directing approach to Ce3+-doped CaS luminescent micro-nanocrystals
Source: Royal Society of Chemistry journal article supplement (doi:10.1039/c5ce01800e), 2015-01-01
Supplement: c5ce01800e1.pdf [file c5ce01800e1.pdf]

## Supplementary information

### One-step structure-directing approach to Ce<sup>3+</sup>-doped CaS luminescent micro-nanocrystals

Zhongxian Qiu,<sup>a,b</sup> Hongzhou Lian,<sup>b</sup> Tingting Luo,<sup>a</sup> Jian Fan,<sup>b</sup> Xuechao Cai,<sup>b</sup> Ziyong Cheng,<sup>b</sup>  
Mengmeng Shang,<sup>b</sup> Shixun Lian<sup>a,\*</sup> and Jun Lin<sup>b,\*</sup>

<sup>a</sup> Key Laboratory of Chemical Biology & Traditional Chinese Medicine Research (Ministry of Education), College of Chemistry and Chemical Engineering, Hunan Normal University, Changsha, Hunan 410081, People's Republic of China. E-mail: [sxlian@hunnu.edu.cn](mailto:sxlian@hunnu.edu.cn).

<sup>b</sup> Key Laboratory of Rare Earth Chemistry and Physics, Changchun Institute of Applied Chemistry, Chinese Academy of Sciences, Changchun 130022, People's Republic of China. E-mail: [jlin@ciac.jl.cn](mailto:jlin@ciac.jl.cn).

#### S1 Comparison of XRD patterns of CaS and CaS: 0.01Ce<sup>3+</sup>.

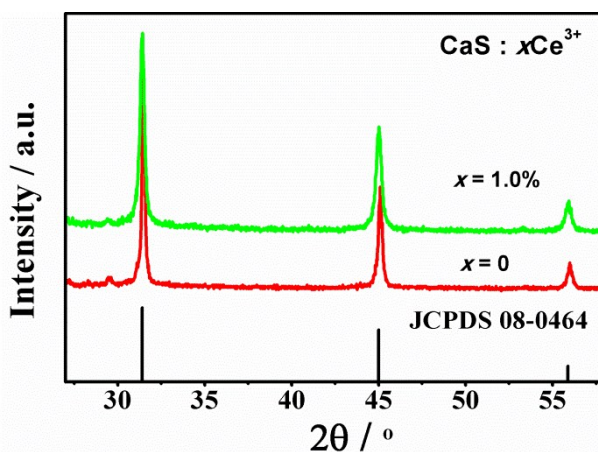

Fig. S1 Comparison of XRD patterns of CaS and CaS: 0.01Ce<sup>3+</sup> synthesized by solvothermal process in en-1-DT co-solvents systems.

#### S2 ICP characterization of Ce<sup>3+</sup> doping concentrations in en system

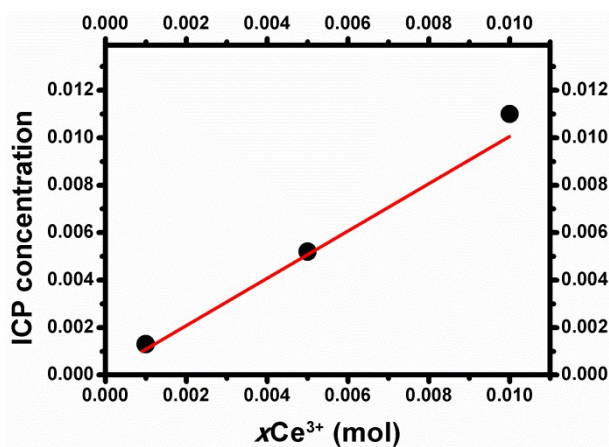

Fig. S3 The correlation of  $\text{Ce}^{3+}$  concentrations determined by ICP with experimental contents in **en** system

### S3 Comparison of emission spectra of phosphors synthesized in different solvothermal systems

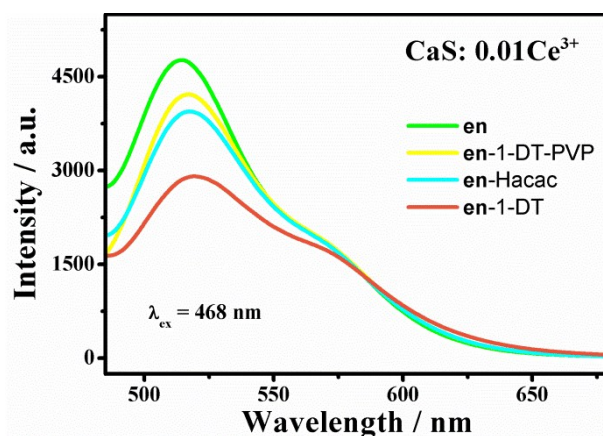

Fig. S3 Emission spectra of  $\text{CaS}: 0.01\text{Ce}^{3+}$  synthesized without or with different co-solvent(s)
